# Supplementary material for: Trends in Healthcare Expenditures Among US Adults With Hypertension: National Estimates, 2003–2014
Source: PubMed Central journal article supplement — J Am Heart Assoc. 2018 May 30;7(11):e008731. doi: 10.1161/JAHA.118.008731 (PMC6015342; doi:10.1161/jaha.118.008731), 2018-05-30
Supplement: JAH3-7-e008731-s001.pdf [file JAH3-7-e008731-s001.pdf]

# **SUPPLEMENTAL MATERIAL**

**Table S1. Unadjusted mean of total healthcare expenditures with and without hypertension among adults (in 2016 USD), MEPS 2003-2014.**

| <b>Costs</b>             | <b>Hypertension<br/>Mean (\$)</b> | <b>95% CI</b>      | <b>No-<br/>Hypertension<br/>Mean (\$)</b> | <b>95% CI</b>      | <b>P value<br/>*</b> |
|--------------------------|-----------------------------------|--------------------|-------------------------------------------|--------------------|----------------------|
| <b>Total costs</b>       |                                   |                    |                                           |                    |                      |
| 2003/06                  | 9,150                             | 8,845–9,455        | 3,981                                     | 3,788–4,174        | <0.001               |
| 2007/10                  | 9,082                             | 8,811–9,352        | 4,120                                     | 3,978–4,262        | <0.001               |
| 2011/14                  | 9,050                             | 8,712–9,388        | 4,422                                     | 4,243–4,601        | <0.001               |
| <i>Pooled<br/>sample</i> | <i>9,089</i>                      | <i>8,900–9,278</i> | <i>4,172</i>                              | <i>4,066–4,277</i> | <i>&lt;0.001</i>     |
| <b>Inpatient</b>         |                                   |                    |                                           |                    |                      |
| 2003/06                  | 2,867                             | 2,683–3,050        | 1,103                                     | 974–1,272          | <0.001               |
| 2007/10                  | 2,787                             | 2,609–2,965        | 1,047                                     | 955–1,139          | <0.001               |
| 2011/14                  | 2,579                             | 2,367–2,791        | 1,127                                     | 1,027–1,227        | <0.001               |
| <i>Pooled<br/>sample</i> | <i>2,731</i>                      | <i>2,614–2,847</i> | <i>1,093</i>                              | <i>1,028–1,157</i> | <i>&lt;0.001</i>     |
| <b>Outpatient</b>        |                                   |                    |                                           |                    |                      |
| 2003/06                  | 2734                              | 2,605–2,863        | 1,425                                     | 1,377–1,473        | <0.001               |
| 2007/10                  | 2,793                             | 2,671–2,915        | 1,569                                     | 1,502–1,637        | <0.001               |
| 2011/14                  | 2,830                             | 2,709–2,951        | 1,638                                     | 1,572–1,705        | <0.001               |
| <i>Pooled<br/>sample</i> | <i>2,791</i>                      | <i>2,716–2,866</i> | <i>1,542</i>                              | <i>1,504–1,580</i> | <i>&lt;0.001</i>     |
| <b>Medications</b>       |                                   |                    |                                           |                    |                      |
| 2003/06                  | 2,430                             | 2,344–2,517        | 726                                       | 695–758            | <0.001               |
| 2007/10                  | 2,308                             | 2,231–2,385        | 812                                       | 773–852            | <0.001               |
| 2011/14                  | 2,384                             | 2,270–2,499        | 909                                       | 820–998            | <0.001               |
| <i>Pooled<br/>sample</i> | <i>2,371</i>                      | <i>2,312–2,430</i> | <i>814</i>                                | <i>779–850</i>     | <i>&lt;0.001</i>     |
| <b>Emergency Room</b>    |                                   |                    |                                           |                    |                      |
| 2003/06                  | 242                               | 223–261            | 163                                       | 154–172            | <0.001               |
| 2007/10                  | 280                               | 260–300            | 187                                       | 174–200            | <0.001               |
| 2011/14                  | 317                               | 298–336            | 219                                       | 204–233            | <0.001               |
| <i>Pooled<br/>sample</i> | <i>283</i>                        | <i>272–295</i>     | <i>189</i>                                | <i>182–196</i>     | <i>&lt;0.001</i>     |
| <b>Home Health</b>       |                                   |                    |                                           |                    |                      |
| 2003/06                  | 351                               | 307–396            | 135                                       | 31–238             | <0.001               |
| 2007/10                  | 391                               | 326–457            | 84                                        | 63–105             | <0.001               |
| 2011/14                  | 447                               | 367–527            | 105                                       | 73–137             | <0.001               |
| <i>Pooled<br/>sample</i> | <i>401</i>                        | <i>358–444</i>     | <i>108</i>                                | <i>70–146</i>      | <i>&lt;0.001</i>     |
| <b>Others</b>            |                                   |                    |                                           |                    |                      |
| 2003/06                  | 523                               | 496–550            | 427                                       | 413–441            | <0.001               |
| 2007/10                  | 520                               | 496–543            | 418                                       | 403–433            | <0.001               |
| 2011/14                  | 491                               | 466–515            | 422                                       | 403–440            | <0.001               |
| <i>Pooled<br/>sample</i> | <i>510</i>                        | <i>494–525</i>     | <i>422</i>                                | <i>413–432</i>     | <i>&lt;0.001</i>     |

\*All comparisons significant at p<0.001

**Table S2. Two-part regression model: Incremental effects of healthcare expenditures among adults with hypertension, adjusted for comorbid conditions (in 2016 USD).**

| <b>Variables*</b>                     | <b>Incremental Cost</b> | <b>95% CI</b>  | <b>P-value</b> |
|---------------------------------------|-------------------------|----------------|----------------|
| <b>Primary independent variable</b>   |                         |                |                |
| No-Hypertension (Ref.)                | –                       | –              |                |
| Hypertension                          | 1,866                   | 1,676–2,056    | <0.001         |
| <b>Covariates</b>                     |                         |                |                |
| Age 18-44 years (Ref.)                | –                       | –              |                |
| Age 45-64 years                       | 1,782                   | 1,569–1,996    | <0.001         |
| Age 65-85 years                       | 2,279                   | 2,028–2,530    | <0.001         |
| Male (Ref.)                           | –                       | –              |                |
| Female                                | 1,318                   | 1,220–1,517    | <0.001         |
| Non-Hispanic White (Ref.)             | –                       | –              |                |
| Non-Hispanic Black                    | -643                    | -921– -365     | <0.001         |
| Hispanic                              | -1,279                  | -1,534– -1,023 | <0.001         |
| Others                                | -1,048                  | -1,552– -543   | <0.001         |
| Married (Ref.)                        | –                       | –              |                |
| Non-married †                         | -114                    | -315– 85       | 0.260          |
| Never married                         | -641                    | -897– -384     | <0.001         |
| <High School (Ref.)                   | –                       | –              |                |
| High school                           | 121                     | -279–522       | 0.552          |
| College or more                       | 510                     | 99–921         | 0.015          |
| Private (Ref.)                        | –                       | –              |                |
| Public insured                        | 805                     | 504–1,107      | <0.001         |
| Uninsured                             | -3,299                  | -3,502– -3,096 | <0.001         |
| Northeast (Ref.)                      | –                       | –              |                |
| Midwest                               | 142                     | -175–460       | 0.379          |
| South                                 | -399                    | -683 --116     | 0.006          |
| West                                  | 49                      | -319–418       | 0.792          |
| Poor income (Ref.)                    | –                       | –              |                |
| Low income                            | -845                    | -1,201– -489   | <0.001         |
| Middle income                         | -1,109                  | -1,434– -783   | <0.001         |
| High income                           | -980                    | -1,326– -633   | <0.001         |
| No Myocardial infarct (Ref.)          | –                       | –              |                |
| Myocardial infarct                    | 5,442                   | 4,516–6,367    | <0.001         |
| No Congestive heart failure (Ref.)    | –                       | –              |                |
| Congestive heart failure              | 6,549                   | 5,546–7,552    | <0.001         |
| No Peripheral vascular disease (Ref.) | –                       | –              |                |
| Peripheral vascular disease           | 7,308                   | 5,857–8,758    | <0.001         |

|                                            |        |               |        |
|--------------------------------------------|--------|---------------|--------|
| No Dementia (Ref.)                         |        |               |        |
| Dementia                                   | 3,399  | 2,131–4,667   | <0.001 |
| No Stroke (Ref.)                           |        |               |        |
| Stroke                                     | 4,743  | 3,922–5,565   | <0.001 |
| No Chronic pulmonary disease (Ref.)        |        |               |        |
| Chronic pulmonary disease                  | 3,117  | 2,343–3,891   | <0.001 |
| No Connective tissue disease (Ref.)        |        |               |        |
| Connective tissue disease                  | 3,719  | 2,998–4,439   | <0.001 |
| No Ulcer disease (Ref.)                    |        |               |        |
| Ulcer disease                              | 4,364  | 2,727–6,000   | <0.001 |
| No Mild liver disease (Ref.)               |        |               |        |
| Mild liver disease                         | 8,408  | 1,925–14,890  | 0.011  |
| No Hemiplegia (Ref.)                       |        |               |        |
| Hemiplegia                                 | 2,694  | 2,152–3,236   | <0.001 |
| No Moderate or severe renal disease (Ref.) |        |               |        |
| Moderate or severe renal disease           | 14,766 | 11,794–17,739 | <0.001 |
| No Diabetes (Ref.)                         |        |               |        |
| Diabetes                                   | 3,222  | 2,916–3,529   | <0.001 |
| No Any tumor (Ref.)                        |        |               |        |
| Any tumor                                  | 5,782  | 5,009–6,556   | <0.001 |
| No Leukemia (Ref.)                         |        |               |        |
| Leukemia                                   | 12,551 | 7,158–17,945  | <0.001 |
| No Lymphoma (Ref.)                         |        |               |        |
| Lymphoma                                   | 12,893 | 6,269–19,516  | <0.001 |
| No Moderate or severe liver disease (Ref.) |        |               |        |
| Moderate or severe liver disease           | 4,687  | 2,480–6,894   | <0.001 |
| No Metastatic solid tumor (Ref.)           |        |               |        |
| Metastatic solid tumor                     | 9,977  | 7,172–12,782  | <0.001 |
| Year 2003/06 (Ref.)                        | –      | –             |        |
| Year 2007/10                               | -95    | -302–111      | 0.364  |
| Year 2011/14                               | 154    | -107–417      | 0.246  |

\* Primary outcome variable in this model is total health care expenditures

† Non-married includes widowed, separated, and/or divorced.
